# Supplementary material for: The role of liquid water percolation representation in estimating snow water equivalent in a Mediterranean mountain region (Mount Lebanon)
Source: Copernicus journal article supplement (doi:10.5194/hess-24-1527-2020), 2020-04-01
Supplement: Supplementary file 1 [file hess-24-1527-2020-supplement.pdf]

Supplement of Hydrol. Earth Syst. Sci., 24, 1527–1542, 2020  
<https://doi.org/10.5194/hess-24-1527-2020-supplement>  
© Author(s) 2020. This work is distributed under  
the Creative Commons Attribution 4.0 License.

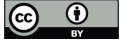

*Supplement of*

**The role of liquid water percolation representation in  
estimating snow water equivalent in a Mediterranean  
mountain region (Mount Lebanon)**

**Abbas Fayad and Simon Gascoïn**

*Correspondence to:* Abbas Fayad ([abbas.fayad@usask.ca](mailto:abbas.fayad@usask.ca))

The copyright of individual parts of the supplement might differ from the CC BY 4.0 License.

## Supplement

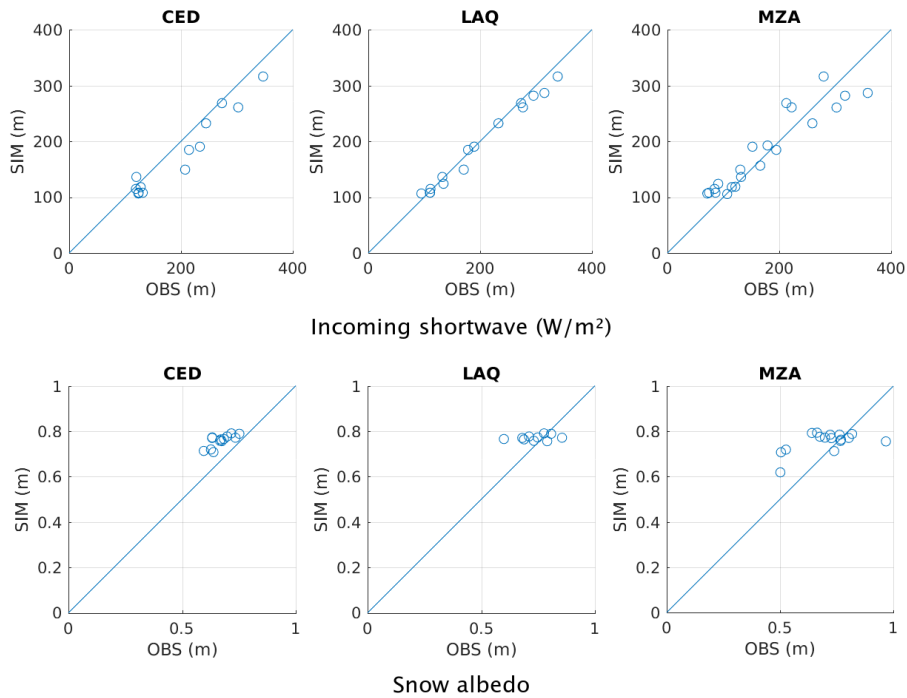

**Figure S1.** Scatterplots of observed vs. modelled monthly incoming shortwave radiation and snow albedo.

Figure S1 compares the monthly observed and modelled shortwave radiation and snow albedo at the three AWS. Here the Pflug et al. (2019) model was used. The incoming shortwave is well simulated with correlation coefficients ranging between 0.94 and 0.99 and RMSE ranging between  $13 \text{ W m}^{-2}$  (LAQ) and  $32 \text{ W m}^{-2}$  (MZA). The snow albedo variability is less accurately captured but the RMSE remains acceptable with 0.086, 0.074, and 0.096 at CED, LAQ, and MZA respectively.
